# Supplementary material for: “I should have started earlier, but I was not feeling ill!” Perceptions of Kalenjin women on antenatal care and its implications on initial access and differentials in patterns of antenatal care utilization in rural Uasin Gishu County Kenya
Source: PLoS One. 2018 Oct 3;13(10):e0202895. doi: 10.1371/journal.pone.0202895 (PMC6169856; doi:10.1371/journal.pone.0202895)

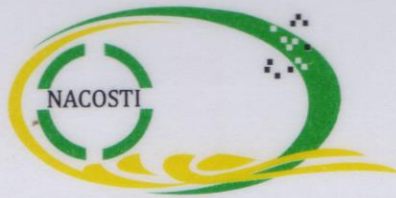

## NATIONAL COMMISSION FOR SCIENCE, TECHNOLOGY AND INNOVATION

Telephone: +254-20-2213471,  
2241349, 310571, 2219420  
Fax: +254-20-318245, 318249  
Email: secretary@nacosti.go.ke  
Website: www.nacosti.go.ke  
When replying please quote

9<sup>th</sup> Floor, Utalii House  
Uhuru Highway  
P.O. Box 30623-00100  
NAIROBI-KENYA

Ref: No.

Date:

2<sup>nd</sup> April, 2015

**NACOSTI/P/15/2335/5353**

Roselyter Monchari Rianga  
Vu University Amsterdam  
**NETHERLANDS.**

### **RE: RESEARCH AUTHORIZATION**

Following your application for authority to carry out research on "*Knowledge of food taboos on maternal nutrition intervention programs,*" I am pleased to inform you that you have been authorized to undertake research in **Uasin-Gishu County** for a period ending **1<sup>st</sup> September, 2017.**

You are advised to report to **the County Commissioner and the County Director of Education, Uasin-Gishu County** before embarking on the research project.

On completion of the research, you are required to submit **two hard copies and one soft copy in pdf** of the research report/thesis to our office.

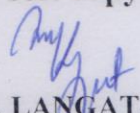  
**DR. S. K. LANGAT, OGW**  
**FOR: DIRECTOR GENERAL/CEO**

Copy to:

The County Commissioner  
Uasin-Gishu County.

The County Director of Education  
Uasin-Gishu County.

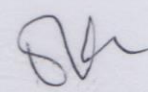  
**COUNTY COMMISSIONER**  
**UASIN-GISHU COUNTY**  
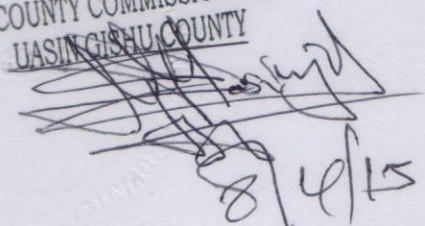

**THIS IS TO CERTIFY THAT:**

**MS. ROSELYTER MONCHARI RIANGA**

**of VU UNIVERSITY AMSTERDAM,**

**3268-1002 madaraka, has been**

**permitted to conduct research in**

**Uasin-Gishu County**

**on the topic: KNOWLEDGE OF FOOD**

**TABOOS ON MATERNAL NUTRITION**

**INTERVENTION PROGRAMS**

**for the period ending:**

**1st September, 2017**

**Applicant's  
Signature**

**Permit No : NACOSTI/P/15/2335/5353**

**Date Of Issue : 2nd April, 2015**

**Fee Received :Ksh 2,000**

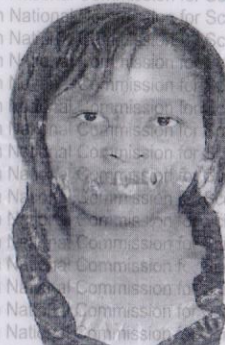

**Director General  
National Commission for Science,  
Technology & Innovation**

## CONDITIONS

1. You must report to the County Commissioner and the County Education Officer of the area before embarking on your research. Failure to do that may lead to the cancellation of your permit
2. Government Officers will not be interviewed without prior appointment.
3. No questionnaire will be used unless it has been approved.
4. Excavation, filming and collection of biological specimens are subject to further permission from the relevant Government Ministries.
5. You are required to submit at least two(2) hard copies and one(1) soft copy of your final report.
6. The Government of Kenya reserves the right to modify the conditions of this permit including its cancellation without notice

*Alfred Kage*

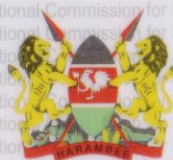

**REPUBLIC OF KENYA**

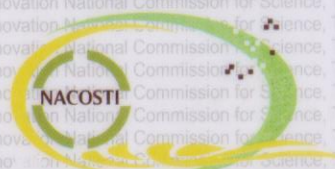

**National Commission for Science,  
Technology and Innovation**

**RESEARCH CLEARANCE  
PERMIT**

**Serial No. A 4794**

**CONDITIONS: see back page**

REPUBLIC OF KENYA  
COUNTY GOVERNMENT OF UASIN GISHU

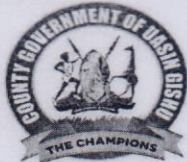

**OFFICE OF THE COUNTY DIRECTOR – HEALTH SERVICES**

TELEGRAMS “MEDICAL” ELDORET  
TEL: (053) 2062711/2031421  
FAX (053) 2062711

UASIN GISHU COUNTY  
P O BOX 5665 – 30100  
ELDORET

Date: 6<sup>th</sup> May 2015

When replying please Quote:

Ref: CDH/UG/RESEARCH/2015 (ID.NO.21832101)

Roselyter Monchari Rieng'a  
VU University, Amsterdam  
NETHERLANDS

**RE: RESEARCH AUTHORIZATION**

Following an approval by the National Commission for Science, Technology and Innovation (NACOSTI) to conduct a research in Uasin Gishu County, entitled '*Knowledge of food taboos on maternal nutrition intervention programs*', we grant you permission to carry out your research in Uasin Gishu County, for a period not exceeding 1<sup>st</sup> September 2017.

On completion of this research, you are required to submit one (1) hard copy and one (1) soft copy of the research report to my office.

By copy of this letter, I confirm to any persons concerned to accord you the necessary support; and I wish you well as you undertake the exercise.

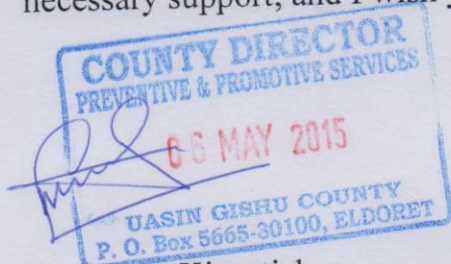

Dr. Evans Kiprotich,

**COUNTY DIRECTOR - P & P SERVICES**  
**UASIN GISHU COUNTY**

REPUBLIC OF KENYA

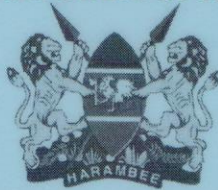

MINISTRY OF EDUCATION, SCIENCE AND TECHNOLOGY  
STATE DEPARTMENT OF EDUCATION

Telegrams: "EDUCATION", Eldoret  
Telephone: 053-2063342 or 2031421/2  
Mobile : 0719 12 72 12/0732 260 280  
Email: [cdeuasingishucounty@yahoo.com](mailto:cdeuasingishucounty@yahoo.com)  
: [cdeuasingishucounty@gmail.com](mailto:cdeuasingishucounty@gmail.com)

When replying please quote:

Office of The County Director of Education,  
Uasin Gishu County,  
P.O. Box 9843-30100,  
**ELDORET.**

Ref: No. MOEST/UGC/TRN/9/VOL II/11

8<sup>TH</sup> APRIL, 2015

Roselyter Monchari Rianga  
Vu University Amsterdam  
**Netherlands**

**RE: RESEARCH AUTHORIZATION**

This office has received your letter requesting for authority to allow you carry out research on "**Knowledge of Food Taboos on Maternal Nutrition Intervation Programs**", Within Uasin Gishu County."

We wish to inform you that the request has been granted for a period ending **1<sup>st</sup> September, 2017**. The authorities concerned are therefore requested to give you maximum support.

We take this opportunity to wish you well during this research.

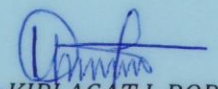  
KIPLAGAT J. ROP

**For: COUNTY DIRECTOR OF EDUCATION  
UASIN GISHU COUNTY**

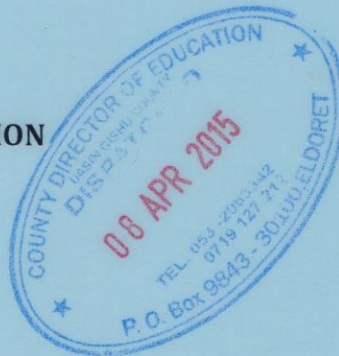

Amsterdam, 25 February 2015

**To whom it may concern**

On behalf of the VU University Amsterdam, I am pleased to introduce to you Ms Roselyter M. Rianga. Ms Rianga, also staff member of Moi University in Kenya, is currently enrolled in the PhD programme at the Athena Institute of the VU University Amsterdam in the Netherlands. One of her major tasks is to conduct research on *Knowledge of Food Taboos on Maternal Nutrition Intervention Programs*. This research is funded by a project titled *A Sustainable Approach to Livelihood Improvement (ASALI)*, which is a joint undertaking of Moi University, South Eastern Kenya University and VU University Amsterdam. The major part of Ms Rianga's research will be conducted in Kenya, particularly in the Uasin Gishu County. To do so, Ms Rianga will spend at least two periods of 3 to 6 months (during 2015-2017) in Kenya to gather data within local communities and visit relevant institutes. The remainder time serves for data analysis and thesis writing at the VU University in the Netherlands.

The main supervisor of Ms Rianga in the Netherlands is Prof. Dr Jaqueline Broerse of the Athena Institute. The local supervisor is Prof Dr Anne Nangulu of Moi University.

We kindly ask the support of your good office to assist Ms Rianga with her requests necessary for successful completion of her Ph.D research.

Thank you so much in advance for your collaboration and support.

Yours sincerely,

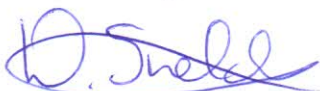

Dr Denyse J Snelder  
ASALI Project Coordinator  
CIS -VU International Office  
VU University Amsterdam  
De Boelelaan 1107  
1081 HV Amsterdam  
The Netherlands

Moi University  
P.O. Box 3900 – 03100  
Eldoret

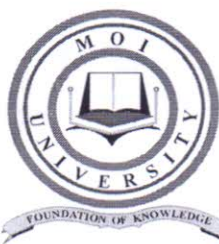

**MOI UNIVERSITY**  
**SCHOOL OF ARTS AND SOCIAL SCIENCES**  
**DEPARTMENT OF SOCIOLOGY AND PSYCHOLOGY**

Tel: 254-053-43620

P.O. Box 3900 - 30100

ELDORET - KENYA

FAX: 254-053-43047

Telex: 35047 MOIVARSITY

E-Mail: vcmu@irmmoi.com

6<sup>th</sup> March 2015

The Chief Executive Officer/Secretary  
National Commission for Science Technology and Innovation  
P.O. Box 30623-00100,  
Nairobi, Kenya

Dear Sir,

**RE: LETTER OF AFFILIATION FOR Ms ROSELYTER M RIANG'A**

This is to certify that the above named is a member of staff in the Department of Sociology and Psychology in this University. Ms. Rianga is currently enrolled for a doctorate degree at VU University of Amsterdam in the Netherlands and is due to proceed for field work/data collection. Her research proposal is titled: "KNOWLEDGE OF FOOD TABOOS ON MATERNAL NUTRITION INTERVENTION PROGRAMMES. The study will be conducted in Uasin Gishu County. The research will be in two phases with the first phase taking place between March 2015 to October 2015. The second phase will be in 2016 – 2017.

Any assistance accorded to her for procurement of the research permit will be appreciated.

Yours Sincerely

**DR JAMIN R M MASINDE (PhD)**

E-Mail: drjaminmasinde@yahoo.co.uk

**HEAD OF DEPARTMENT, SOCIOLOGY AND PSYCHOLOGY**  
**MOI UNIVERSITY**

## DECLARATION

### DECLARATION BY CANDIDATE

This proposal is my original work and has not been presented for a degree award in any university. No part of this proposal may be produced without prior permission from the author and/or VU University Amsterdam.

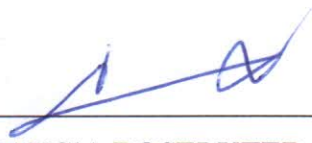

**RIANG'A ROSELYTER**

25-02-2015

**DATE**

### DECLARATION BY SUPERVISORS

This proposal has been submitted with our approval as university supervisors.

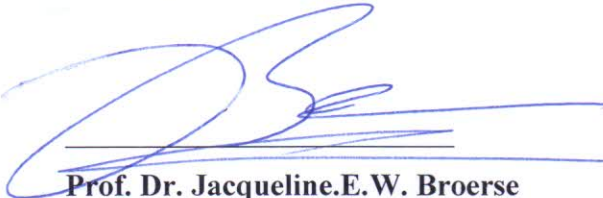

**Prof. Dr. Jacqueline E. W. Broerse**

**Athena Institute**

**VU University Amsterdam**

**Faculty of Earth and Life Sciences**

26-02-2015

**DATE**

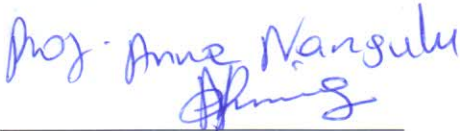

**Prof. Ann Nangulu**

**Department of History**

**Moi University**

**School of Arts and Social Studies**

6/3/2015

**DATE**

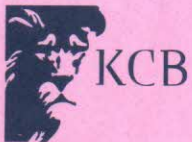

Date: 10/03/2015

CREDIT ADVISE  
CASH DEPOSIT

KCB THIKA

Account AT KCB KIPANDE HOUSE

ACCOUNT DETAILS

A/C NO: 1104162547  
A/C REF: 005241970364  
NAT COMM FOR SCI ,TECH AND INNOV  
Current Account-Corp Inst. Bankin

We have credited your above account with

2,000.00 KES

Kenya Shillings TWO THOUSAND ONLY

CASH PAID IN BY: ROSELYTER M RIANGA  
RESEARCH PERMIT

Signature :.....

Transaction Number: TT150697PWZZ at 11:45:39 On 10/03/2015

Thank you for banking with us. You were served by: OLIVE NUNGARI KIBURU

\*\*\* Advice not valid unless Transaction Number is shown \*\*\*

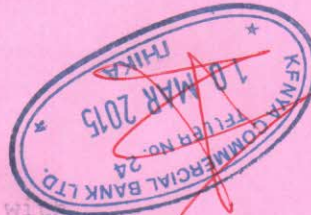

Supplement: S2 Doc — (PDF) [file pone.0202895.s002.pdf]
